# Supplementary material
Source: publisher figshare collection journal article supplement (https://acs.figshare.com/ndownloader/files/20509833)
Supplement: Supplementary file 1 [file 20509833]

# Supporting Information

## Visual Detection of Fluoride anions Using Mixed Lanthanide Metal-Organic Frameworks with a Smartphone

Xiaoliang Zeng<sup>†</sup>, Jing Hu<sup>†</sup>, Meng Zhang<sup>‡</sup>, Fenglei Wang<sup>‡</sup>, Li Wu<sup>\*†</sup>, Xiandeng Hou<sup>\*†‡</sup>

<sup>†</sup> Analytical & Testing Center, Sichuan University, Chengdu, Sichuan 610064, China

<sup>‡</sup> College of Chemistry and Key Laboratory of Green Chemistry and Technology of MOE, Sichuan University, Chengdu, Sichuan 610064, China

\*E-mail: wuli@scu.edu.cn, houxd@scu.edu.cn

### Table of Contents

1. Characterization of prepared MOFs
2. Ratiometric detection of fluoride ions
3. Sensing mechanism of ratiometric sensor
4. Visual detection of fluoride and sample analysis
5. References

## 1. Characterization of prepared MOFs

### 1.1. Crystal structures of Ln-MOFs

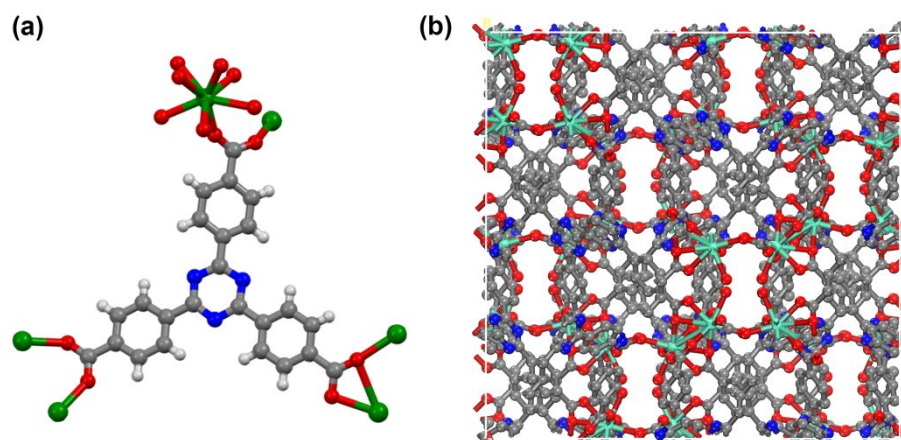

**Figure S1<sup>1</sup>.** (a) Coordination mode of TATB<sup>3-</sup> ligands and Tb<sup>3+</sup> (Tb green, C gray, O red, N blue; H light grey). Each Tb<sup>3+</sup> ion coordinates to one water oxygen atom and seven carboxylic oxygen atoms from six TATB<sup>3-</sup> forming a distorted bicapped tripismatic coordination geometry. (b) Crystal structure of Tb(TATB) viewed along the *bc* plane (Tb green, C gray, O red, N blue; all H atoms are omitted for clarity).

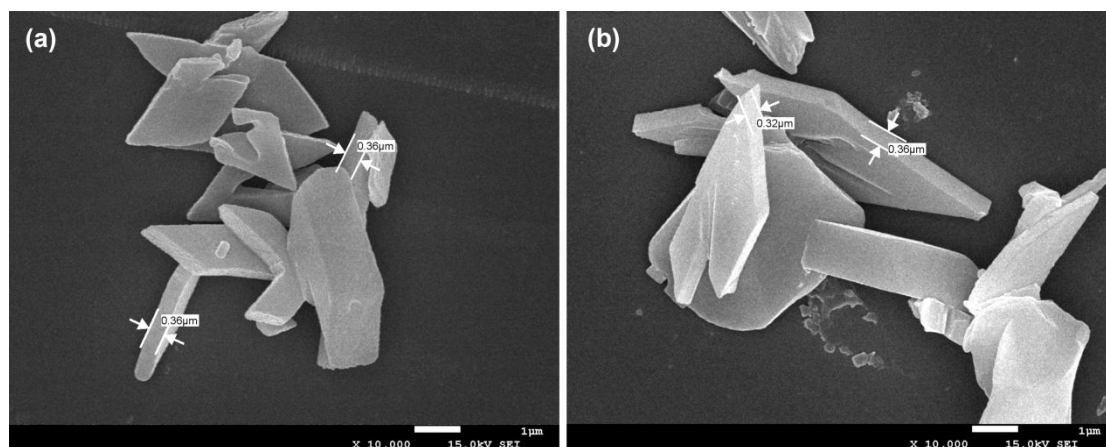

**Figure S2.** SEM images of synthesized Ln-MOFs a) Ln-MOFs 1 and b) Ln-MOFs 4.

### 1.2. Mixed Ln-MOF digestion procedures and Tb<sup>3+</sup>/Eu<sup>3+</sup> ratio determination

The molar ratios of Tb<sup>3+</sup>/Eu<sup>3+</sup> contained in mixed Ln-MOFs were determined by inductively coupled plasma-optical emission spectrometry (ICP-OES) with an ARCOS FHS12 (SPECTRO Analytical Instruments Inc., Germany). Sample digestion and acid evaporation were performed before the analysis by ICP-OES. Typically, each kind of MOF sample (2 mg) was dissolved in a 5 mL mixture of concentrated HNO<sub>3</sub> and HCl (v/v=3:1) and heated at 200 °C for 1 h. After that, the solution was evaporated at 150 °C for 10 min and the residue was diluted to 10 mL with 2% HCl solution (v/v).

**Table S1.** Tb<sup>3+</sup>/Eu<sup>3+</sup> ratios determined by ICP-OES

| MOF              | Tb <sup>3+</sup> (ppm) | Eu <sup>3+</sup> (ppm) | Tb <sup>3+</sup> /Eu <sup>3+</sup> ratio |
|------------------|------------------------|------------------------|------------------------------------------|
| Ln-MOFs <b>4</b> | 13.353                 | 0.412                  | 97:3                                     |
| Ln-MOFs <b>5</b> | 12.687                 | 0.620                  | 95:5                                     |
| Ln-MOFs <b>6</b> | 12.374                 | 1.374                  | 90:10                                    |

### 1.3. Luminescent decay curves and lifetime measurements

Luminescent decay curves were obtained with an Fluorolog-3 spectrofluorometer (Horiba Jobin Yvon) equipped with a spectra LED (280 nm, S-280, Horiba Scientific) as the excitation source. The data were fitted with the second order exponential decay. The efficiency of energy transfer ( $\eta_T$ ) from Tb<sup>3+</sup> to Eu<sup>3+</sup> can be calculated based on the following equation:  $\eta_T = 1 - (\tau/\tau_0)$ , where  $\tau$  and  $\tau_0$  is the luminescent lifetime of Tb<sup>3+</sup> in Ln-MOFs **4** and Ln-MOFs **1**, respectively.<sup>2</sup>

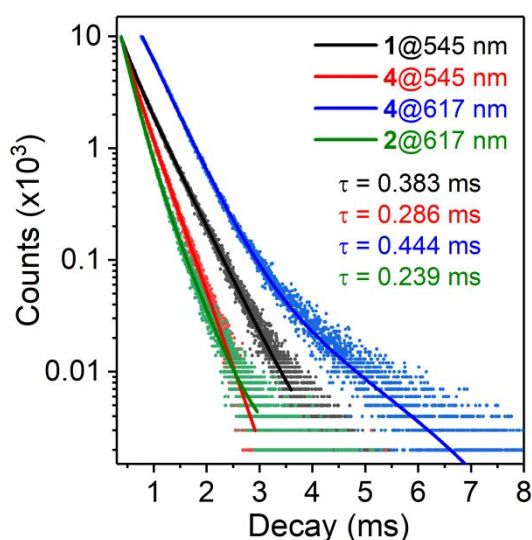

**Figure S3.** Luminescent decay curves of synthesized Ln-MOFs. Black line: Ln-MOFs **1**, red line and blue line: Ln-MOFs **4**; green line: Ln-MOFs **2**.

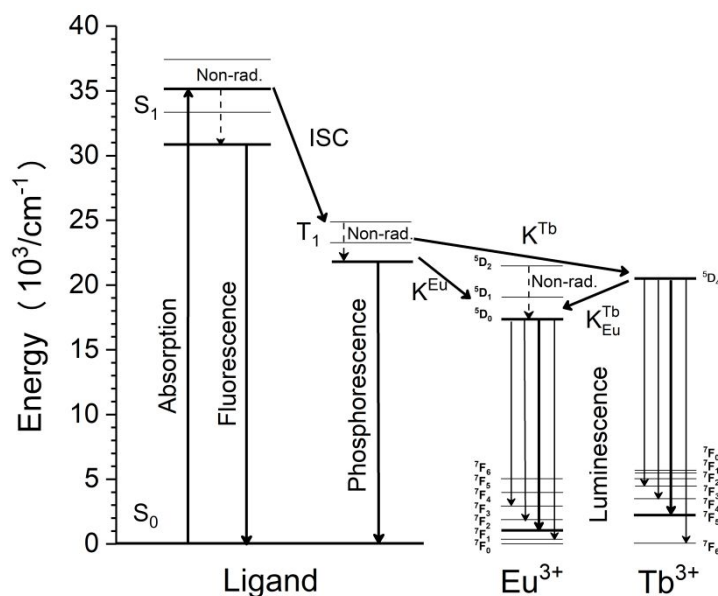

**Figure S4.** The schematic representation of energy transfer pathways in Tb/Eu(TATB). Abbreviations:  $S_0$  = singlet ground state;  $T_1$  = triplet excited state;  $k$  = nonradiative transition probability.

## 2. Ratiometric detection of fluoride ions

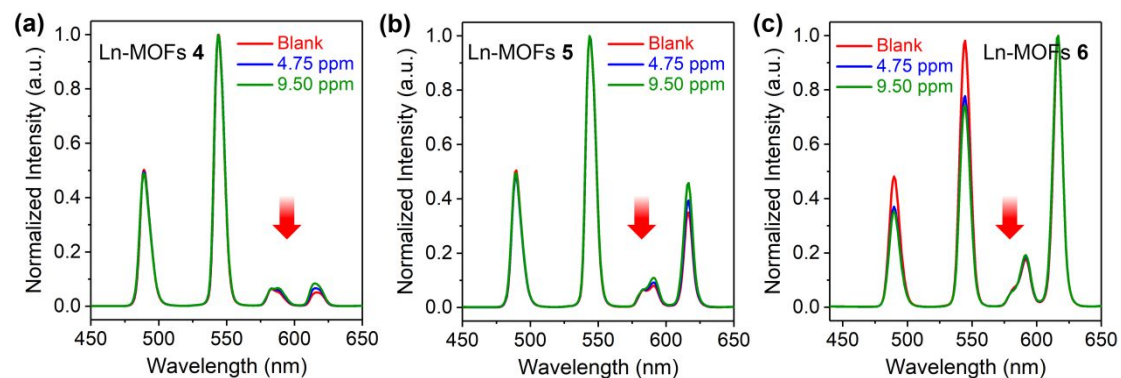

**Figure S5.** The emission spectra of synthesized mixed Ln-MOFs treated with different concentrations of fluoride ions under the excitation at 320 nm. (a) Ln-MOFs 4; (b) Ln-MOFs 5; (c) Ln-MOFs 6.

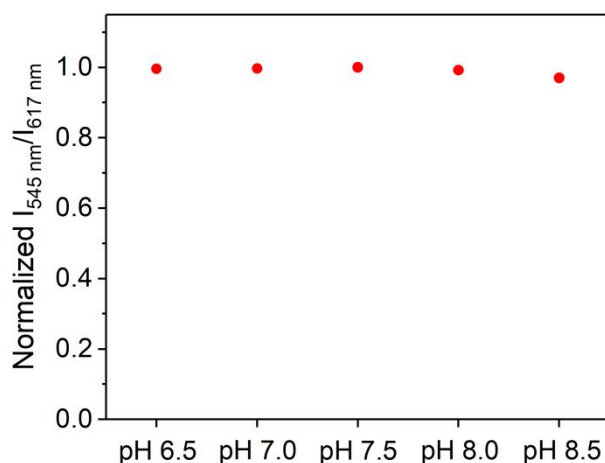

**Figure S6.** The emission intensity ratio ( $I_{545\text{ nm}}/I_{617\text{ nm}}$ ) of Ln-MOFs **4** in solutions with different pH values.

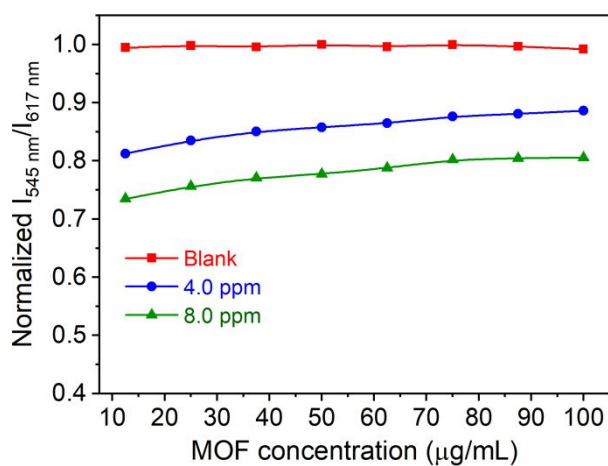

**Figure S7.** The normalized emission intensity ratio ( $I_{545\text{ nm}}/I_{617\text{ nm}}$ ) of Ln-MOFs **4** with different concentrations of MOFs.

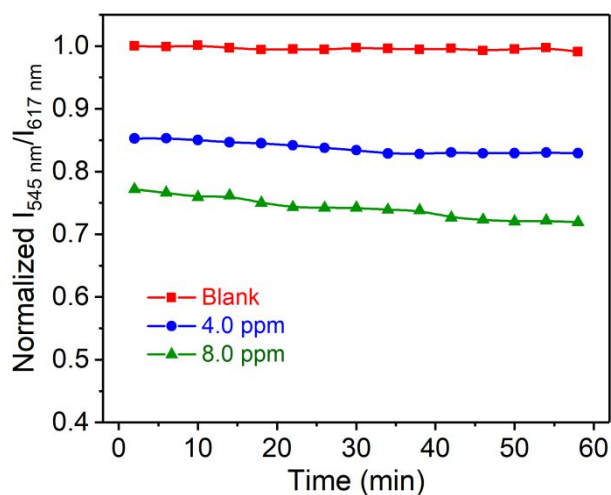

**Figure S8.** The normalized emission intensity ratio ( $I_{545\text{ nm}}/I_{617\text{ nm}}$ ) of Ln-MOFs **4** with different incubation time.

### 3. Sensing mechanism of the ratiometric sensor

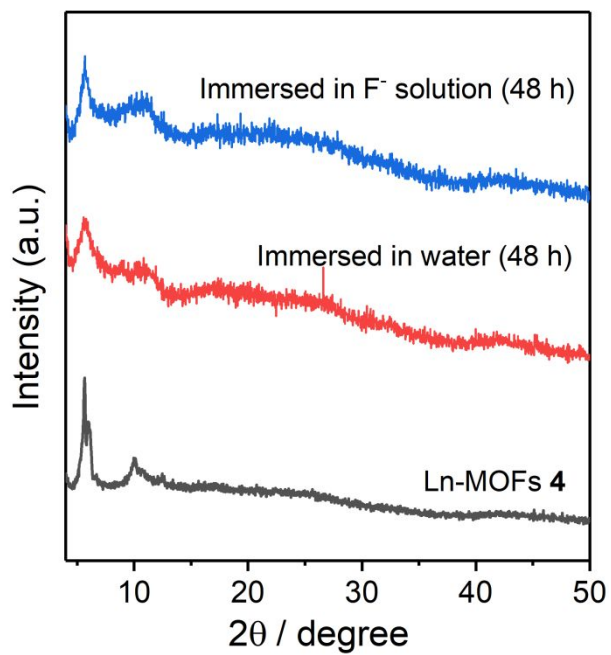

**Figure S9.** PXRD patterns of Ln-MOFs **4** and Ln-MOFs **4** treated with water and fluoride solution (10 ppm), respectively.

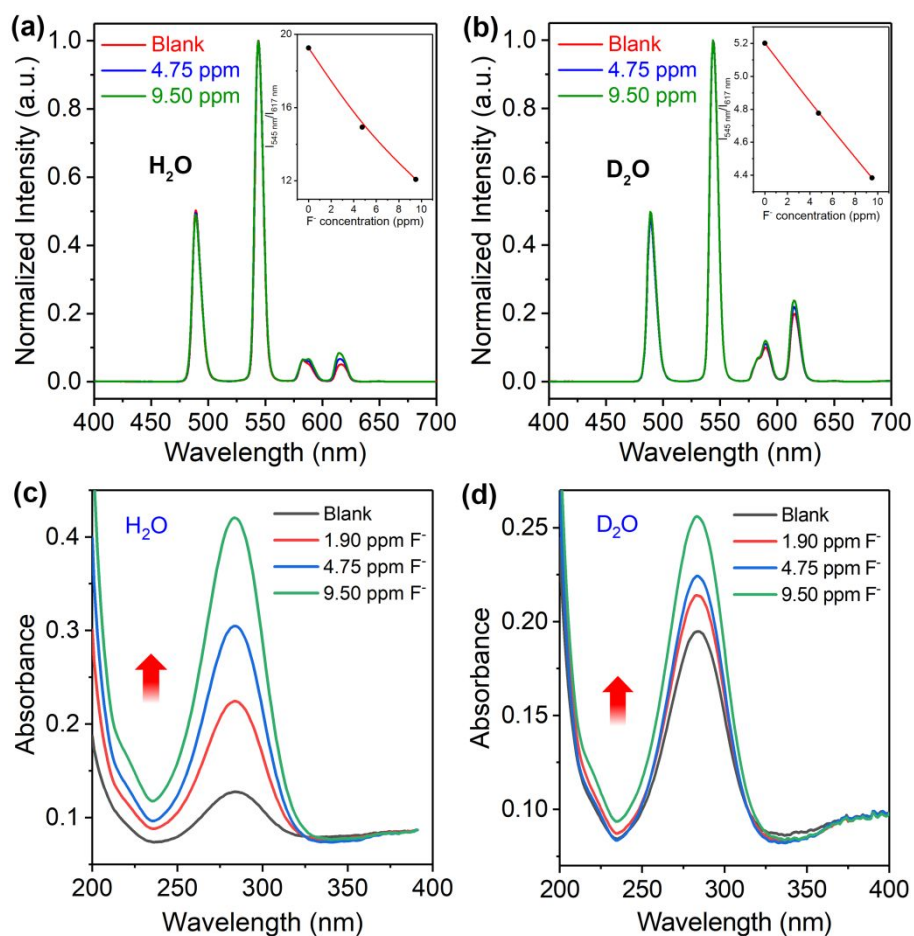

**Figure S10.** Luminescence emission spectra of Ln-MOFs **4** after addition of fluoride ions in the medium of water (a) and heavy water (b), respectively. The inset figures are corresponding changes in  $I_{545\text{ nm}}/I_{617\text{ nm}}$  versus the concentration of F<sup>-</sup>. UV-Vis absorption spectra of Ln-MOFs **4** after addition of fluoride ions in the medium of water (c) and heavy water (d), respectively.

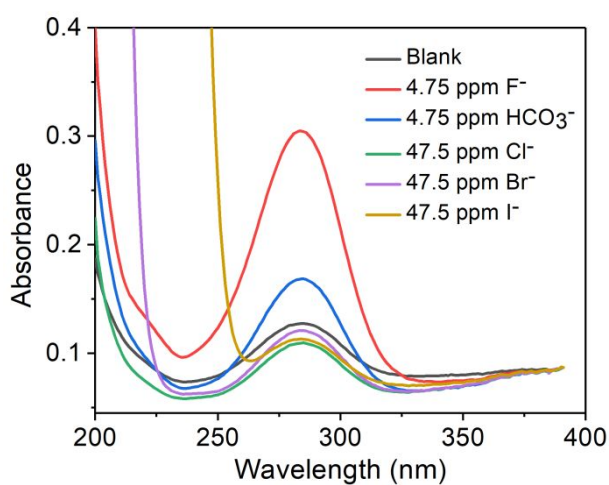

**Figure S11.** UV-Vis absorption spectra of Ln-MOFs **4** after addition of various anions.



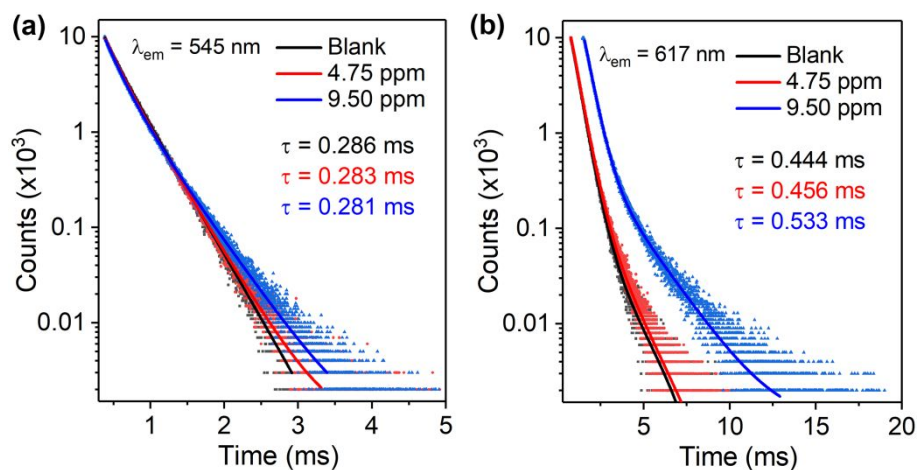

**Figure S12.** Luminescent decay curves of Ln-MOFs **4** after addition of different concentrations of fluoride ions. (a) Monitored at 545 nm; (b) Monitored at 617 nm. The data were fitted with the second order exponential decay.

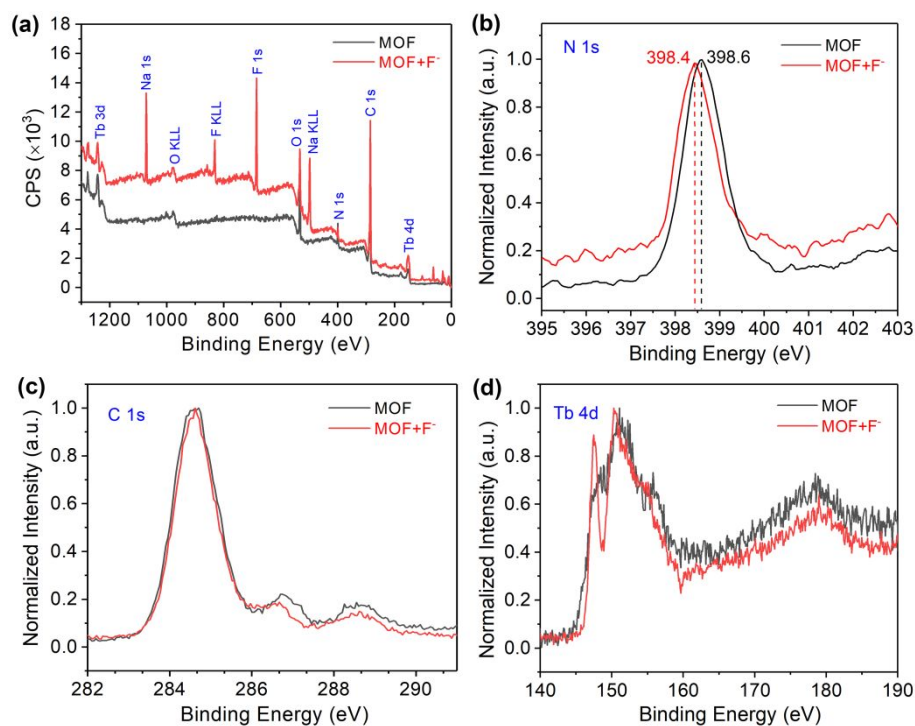

**Figure S13.** XPS spectra of Ln-MOFs **4** before and after being treated with  $F^-$ , respectively. (a) Full spectra; (b) N 1s spectra; (c) C 1s spectra; (d) Tb 4d spectra.



#### 4. Visual detection of fluoride and sample analysis

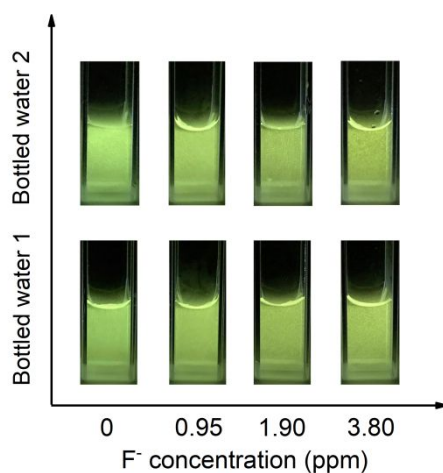

**Figure S14.** Visual detections of F<sup>-</sup> in bottled water samples. The photos were taken with a smartphone under a 310 nm LED lamp.

**Table S2.** Fluoride content in bottled water samples (n=3)

| Sample   | Added (ppm) | This method                  |          |                             |          | By ion chromatography (ppm) |
|----------|-------------|------------------------------|----------|-----------------------------|----------|-----------------------------|
|          |             | Found with fluorometer (ppm) | Recovery | Found with smartphone (ppm) | Recovery |                             |
| Sample-1 | --          | 0.11 ± 0.10                  | --       | n.d.                        | --       | <0.10                       |
|          | 0.95        | 0.94 ± 0.11                  | 87.4%    | 1.07 ± 0.16                 | 113%     | 0.94                        |
|          | 1.90        | 1.63 ± 0.13                  | 80.1%    | 1.97 ± 0.32                 | 104%     | 1.86                        |
|          | 3.80        | --                           | --       | 3.59 ± 0.16                 | 94.5%    | 3.64                        |
| Sample-2 | --          | n.d.                         | --       | n.d.                        | --       | <0.10                       |
|          | 0.95        | 0.85 ± 0.04                  | 89.5%    | 1.12 ± 0.14                 | 118%     | 0.93                        |
|          | 1.90        | 1.62 ± 0.13                  | 85.3%    | 2.22 ± 0.32                 | 113%     | 1.88                        |
|          | 3.80        | --                           | --       | 3.47 ± 0.38                 | 91.3%    | 3.72                        |

**Table S3.** Comparison of Ln-MOFs **4** with existing MOF-based F<sup>-</sup> sensors.

| System           | Sensitivity | Selectivity | Ratiometric detection | Visual detection by RGB value | Reference |
|------------------|-------------|-------------|-----------------------|-------------------------------|-----------|
| Fluorescein @MOF | 15 ppb      | Good        | No                    | No                            | 3         |
| MOF-76           | 1900 ppb    | Moderate    | No                    | No                            | 4         |
| Boric acid MOF   | 67 ppb      | Good        | Yes                   | No                            | 5         |
| SION-105         | 9.1 ppb     | Good        | No                    | No                            | 6         |
| Ln-MOFs <b>4</b> | 96 ppb      | Good        | Yes                   | Yes                           | This work |

## 5. References

1. Zhang, H.; Li, N.; Tian, C.; Liu, T.; Du, F.; Lin, P.; Li, Z.; Du, S., Unusual High Thermal Stability within A Series of Novel Lanthanide TATB Frameworks: Synthesis, Structure, and Properties (TATB = 4,4',4''-s-Triazine-2,4,6-triyl-tribenzoate). *Cryst. Growth Des.* **2012**, *12*, 670-678.
2. Zhou, J.; Li, H.; Zhang, H.; Li, H.; Shi, W.; Cheng, P., A Bimetallic Lanthanide Metal – Organic Material as a Self - Calibrating Color - Gradient Luminescent Sensor. *Adv. Mater.* **2015**, *27*, 7072-7077.
3. Hinterholzinger, F. M.; Rühle, B.; Wuttke, S.; Karaghiosoff, K.; Bein, T., Highly Sensitive and Selective Fluoride Detection in Water through Fluorophore Release from A Metal-Organic Framework. *Sci. Rep.* **2013**, *3*, 2562.
4. Chen, B.; Wang, L.; Zapata, F.; Qian, G.; Lobkovsky, E. B., A Luminescent Microporous Metal–Organic Framework for the Recognition and Sensing of Anions. *J. Am. Chem. Soc.* **2008**, *130*, 6718-6719.
5. Yang, Z.-R.; Wang, M.-M.; Wang, X.-S.; Yin, X.-B., Boric-Acid-Functional Lanthanide Metal–Organic Frameworks for Selective Ratiometric Fluorescence Detection of Fluoride Ions. *Anal. Chem.* **2017**, *89*, 1930-1936.
6. Ebrahim, F. M.; Nguyen, T. N.; Shyshkanov, S.; Gładysiak, A.; Favre, P.; Zacharia, A.; Itskos, G.; Dyson, P. J.; Stylianou, K. C., Selective, Fast-Response, and Regenerable Metal–Organic Framework for Sampling Excess Fluoride Levels in Drinking Water. *J. Am. Chem. Soc.* **2019**, *141*, 3052-3058.
